# Supplementary material for: Structures of LIG1 provide a mechanistic basis for understanding a lack of sugar discrimination against a ribonucleotide at the 3'-end of nick DNA
Source: PubMed Central journal article supplement (PMC11035063; doi:10.1016/j.jbc.2024.107216), 2024-03-24
Supplement: mmc1.pdf [file mmc1.pdf]

**Structures of LIG1 provide a mechanistic basis for understanding a lack of sugar  
discrimination against a ribonucleotide at the 3'-end of nick DNA**

**Kanal Elamparithi Balu, Mitchell Gulkis, Danah Almohdar and Melike Çağlayan\***

Department of Biochemistry and Molecular Biology, University of Florida, Gainesville, FL  
32610, USA

\*To whom correspondence should be addressed. Tel.: +1 352-294-8383; E-mail:  
caglayanm@ufl.edu

*Running Title: Inability to exclude ribonucleotide at nick by DNA ligase I*

Supplementary Figures 1-9

Supplementary Tables 1-5

Supplementary Schemes 1-3

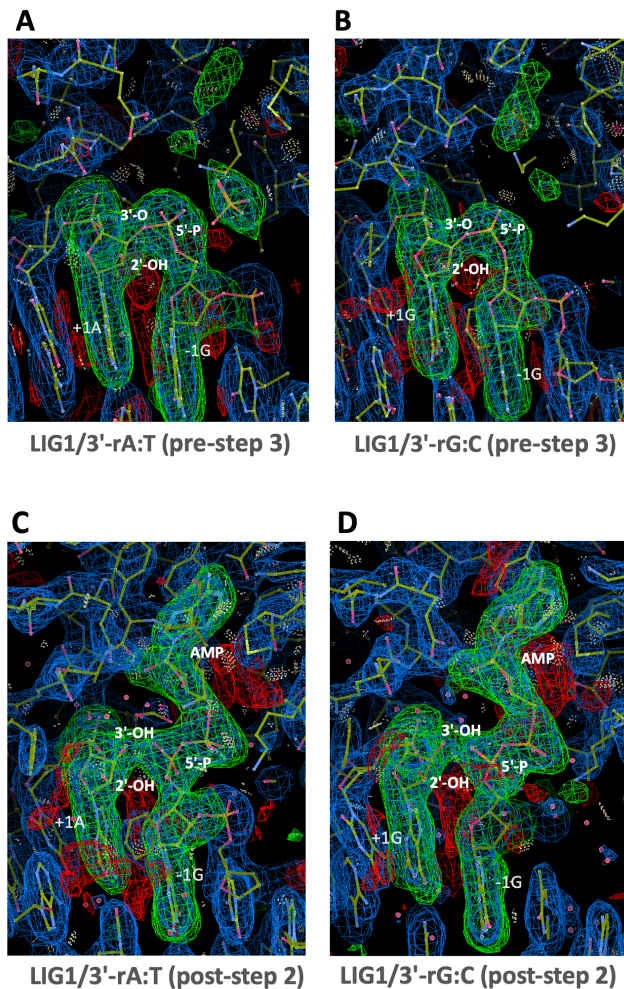

**Supplementary Figure 1. LIG1/RNA-DNA heteroduplex structures show the differences in the position of AMP at the last two steps of the ligation reaction.** Structures of LIG1 in complex with nick DNA containing 3'-ribonucleotide at the nick were shown for the post-step 3 (**A-B**) and pre-step 3 (**C-D**) structures of 3'-rA:T and 3'-rG:C. Simulated annealing omit maps ( $F_o-F_c$ ) of the AMP are contoured at  $3\sigma$ . The map for AMP is incomplete in the LIG1 structures solved in the pre-step 3 of the ligation reaction.

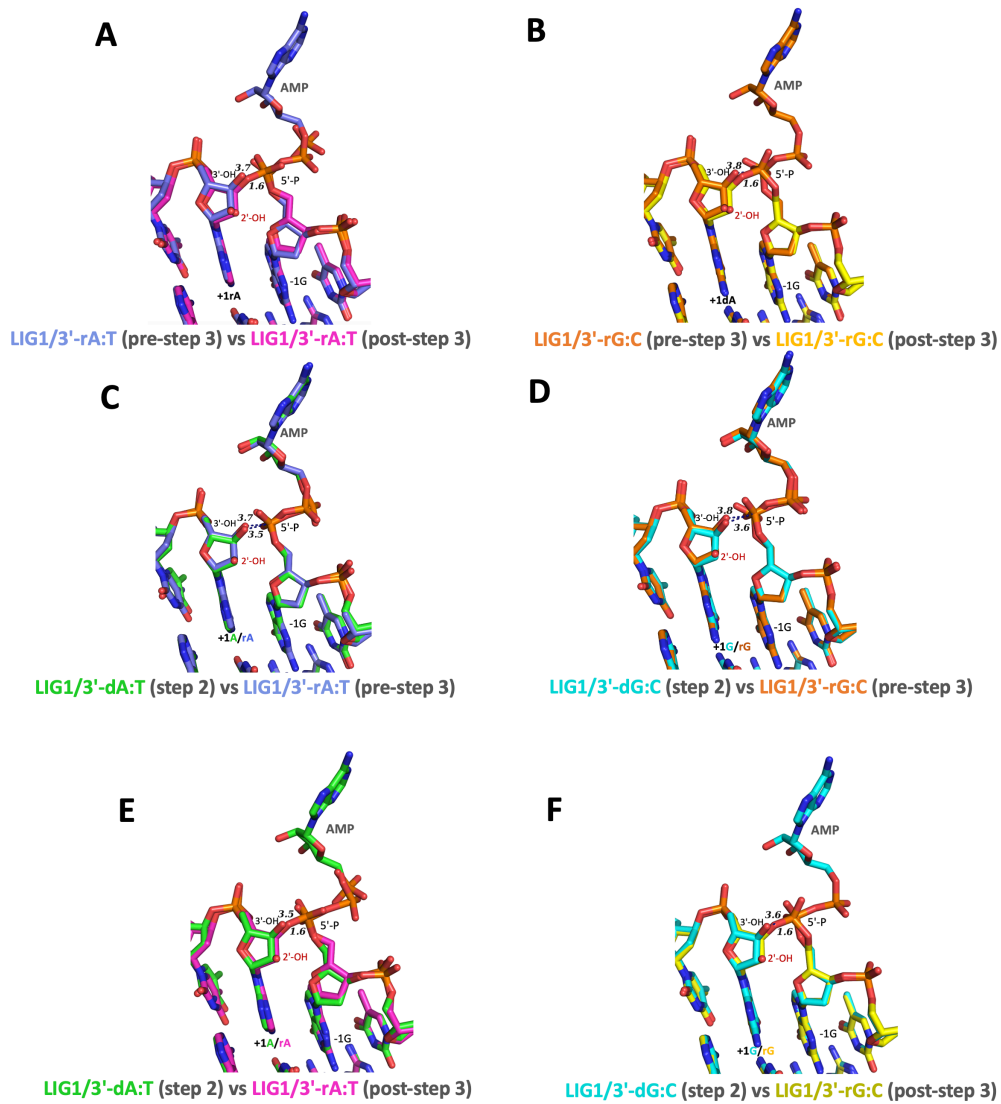

**Supplementary Figure 2. Overlay of LIG1 structures in complex with nick DNA duplexes captured at difference steps of the ligation reaction. (A-F) Superimpositions of LIG1 structures are shown for the nick DNA complexes containing 3'-deoxyribonucleotide (step 2) *versus* 3'-ribonucleotide (pre- and post-step 3) for 3'-rA/dA:T and 3'-rG/dG:C.**

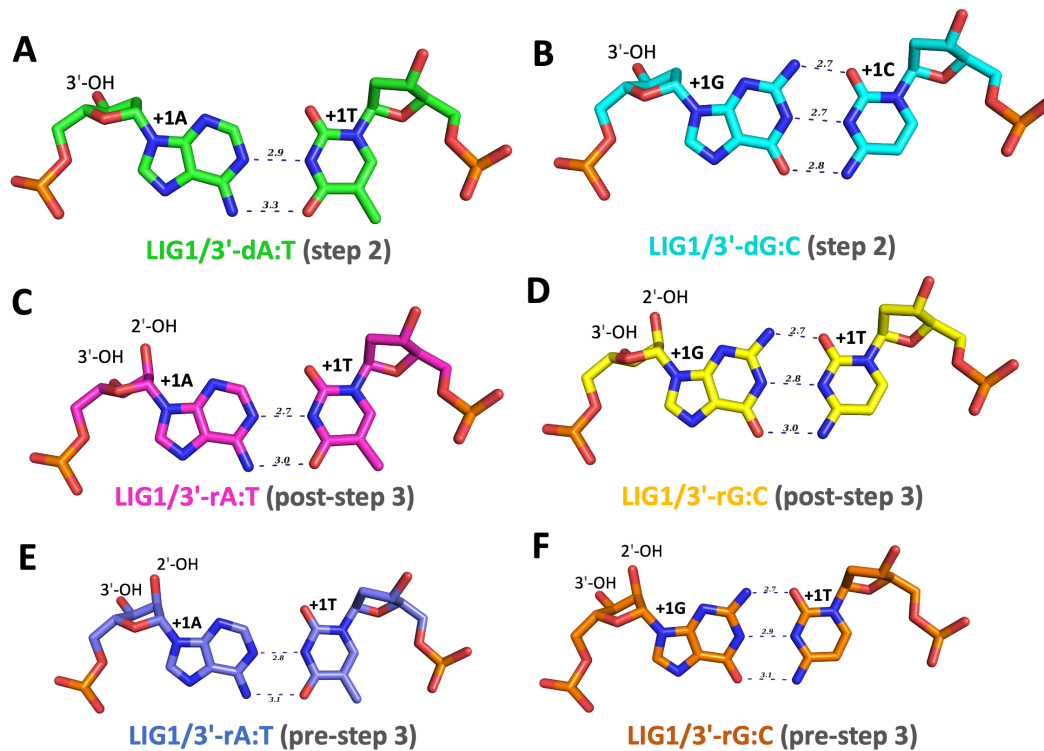

**Supplementary Figure 3. Base-pairing architecture of LIG1 structures.** Watson-Crick base pairing between 3'- and 5'-terminus of the nick DNA are shown for LIG1 structures captured at the step 2 of 3'-dA:T and 3'-dG:C (A-B), the post-step 3 (C-D) and pre-step 3 (E-F) of 3'-rA:T and 3'-rG:C.

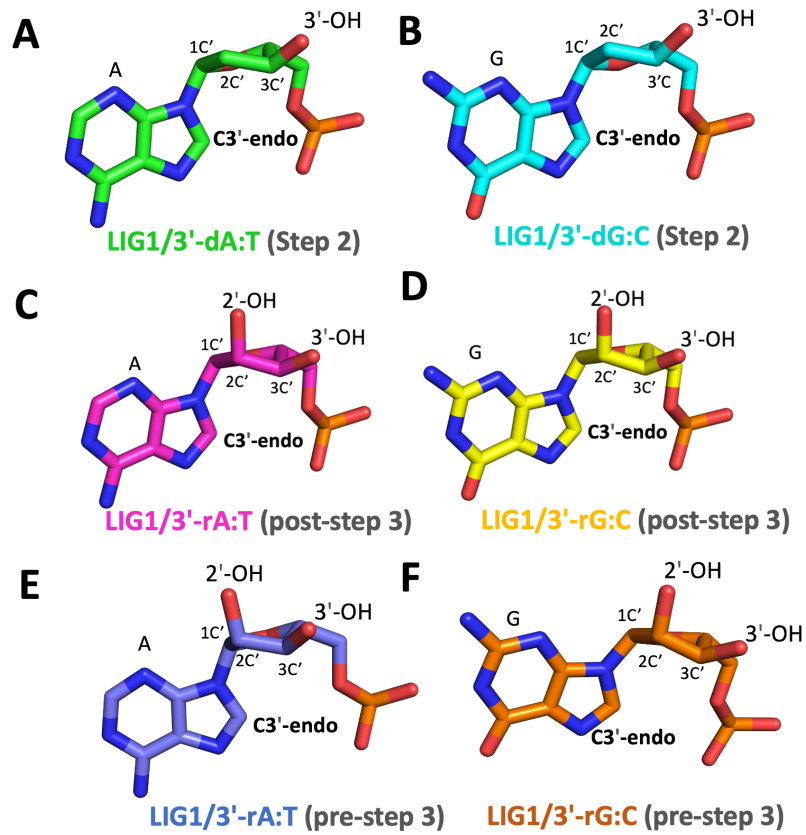

**Supplementary Figure 4. Sugar pucker analyses of LIG1 structures solved in this study.** 3'-end sugar pucker analyses of LIG1 structures are presented for LIG1 structures captured at the step 2 of 3'-dA:T and 3'-dG:C (**A-B**), the post-step 3 (**C-D**) and pre-step 3 (**E-F**) of 3'-rA:T and 3'-rG:C.

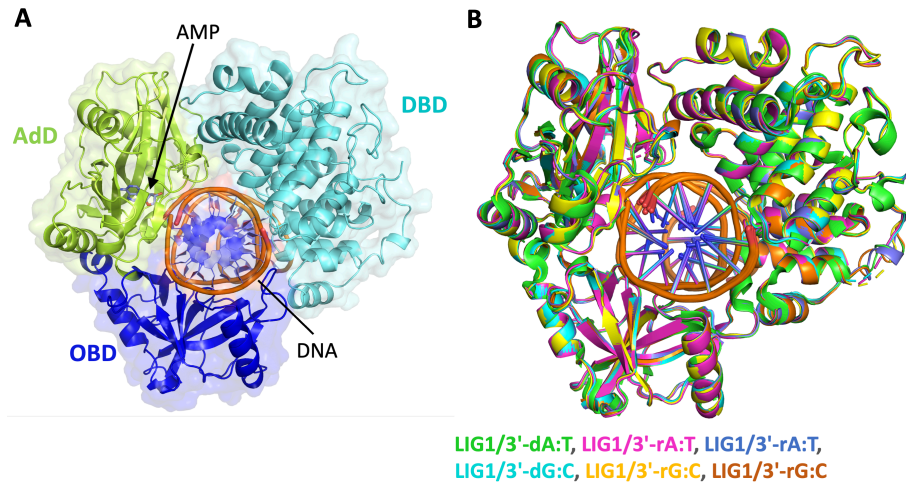

**Supplementary Figure 5. X-ray structures of LIG1-nick DNA complexes.** **(A)** LIG1-AMP complex shows the catalytic core consisting of Adenylation (AdD, green), DNA-binding (DBD, cyan), and Oligonucleotide-binding (OBD, blue) domains that encircle the nick DNA substrate (orange). **(B)** The superimposition of all six LIG1 structures in the present study demonstrate a global conformation that the catalytic core adopts with 3'-deoxyribonucleotide *versus* 3'-ribonucleotide at the nick.

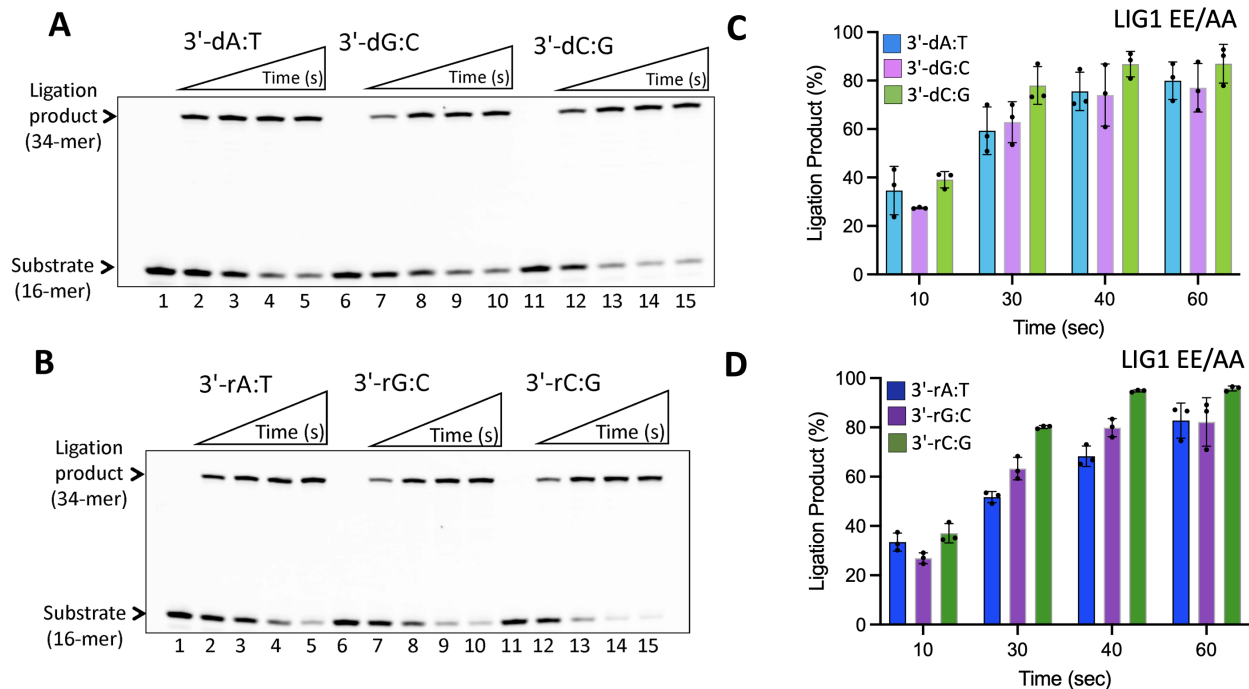

**Supplementary Figure 6. Ligation of the nick DNA substrates with 3'-deoxyribonucleotides versus 3'-ribonucleotides by LIG1 EE/AA low-fidelity mutant.** (A) Lanes 1, 6 and 11 are the negative enzyme controls of the nick DNA substrates and lanes 2-5, 7-10, and 12-15 are the ligation products in the presence of 3'-dA:T, 3'-dG:C, and 3'-dC:G, respectively, and correspond to time points of 10, 30, 40, and 60 sec. (B) Lanes 1, 6 and 11 are the negative enzyme controls of the nick DNA substrates and lanes 2-5, 7-10, and 12-15 are the ligation products in the presence of 3'-rA:T, 3'-rG:C, and 3'-rC:G, respectively, and correspond to time points of 10, 30, 40, and 60 sec. (C-D) Graphs show time-dependent changes in the amount of ligation products and the data represent the average from three independent experiments  $\pm$  SD.

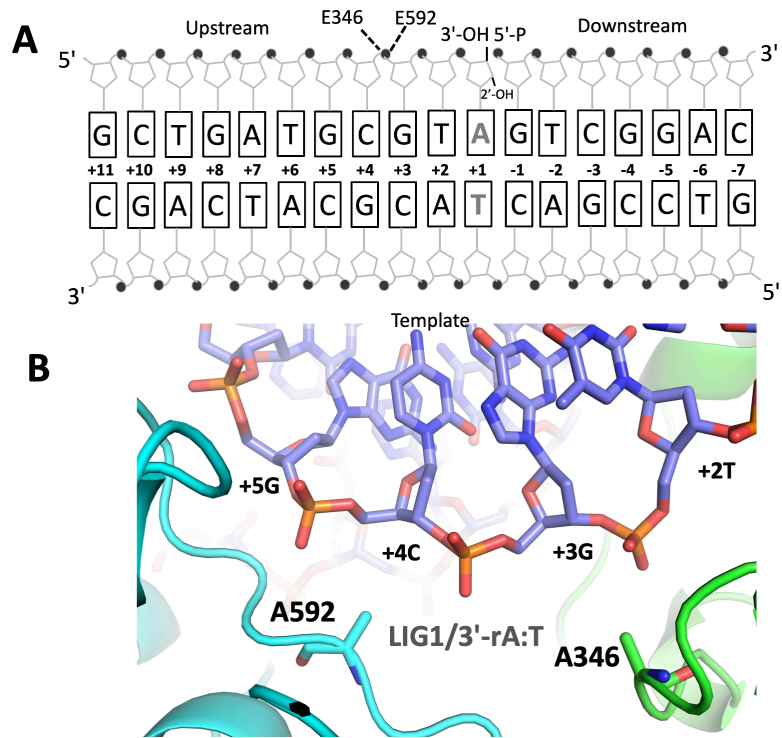

**Supplementary Figure 7. Structures of  $LIG1^{EE/AA}$  demonstrate the position of the high-fidelity site, EE/AA. (A) Schematic view of nick DNA showing the amino acids E346 and E592 that are identified as high-fidelity and  $Mg^{2+}$  binding site. (B) The mutations at this side (E346/A346 and E592/A592, referred as EE/AA) are shown in the  $LIG1$  structures.**



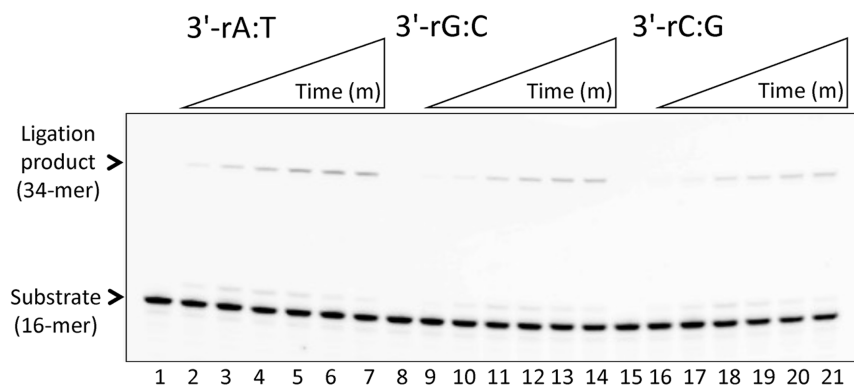

**Supplementary Figure 8. Ligation of the nick DNA substrates with 3'-ribonucleotides in the absence of  $Mg^{2+}$  by LIG1. (A)** Lanes 1, 8 and 15 are the negative enzyme controls of the nick DNA substrates, and lanes 2-7, 9-14, and 16-21 are the ligation products in the presence of 3'-rA:T, 3'-rG:C, and 3'-rC:G, respectively, and correspond to time points of 0.5, 1, 3, 5, 8, and 10 min.

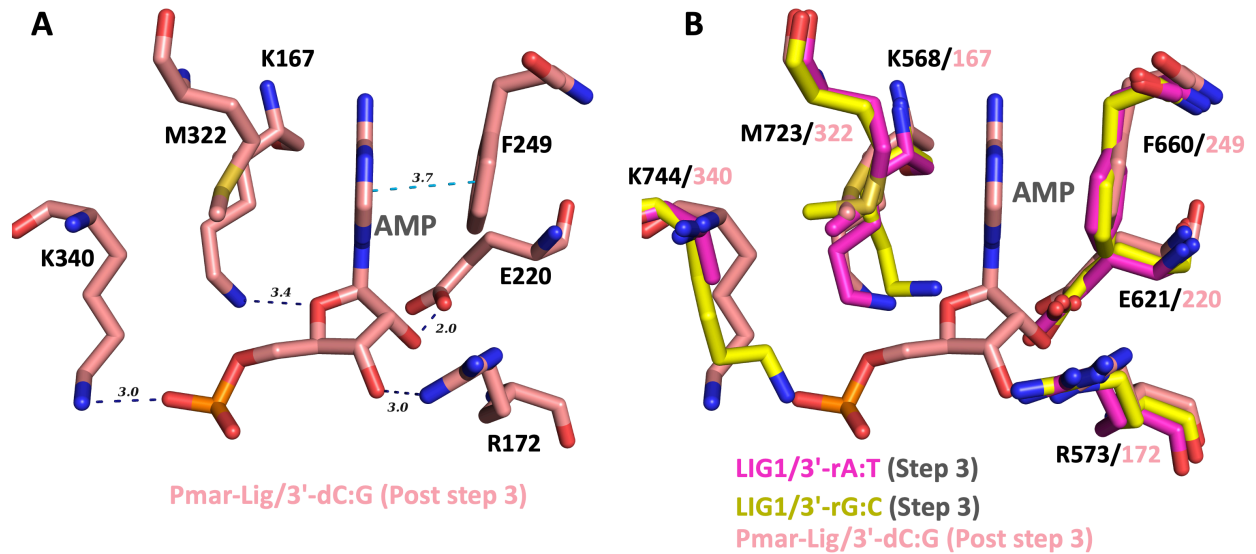

**Supplementary Figure 9. Comparison of Pmar-Lig and LIG1 structures.** The post step 3 structure of ATP-dependent ligase from *Prochlorococcus marinus* (Pmar-Lig) is used (PDB: 6RAU) to compare with LIG1 step 2 and step 3 structures of the present study. **(A)** The overlay for the active site amino acid residues of Pmar-Lig shares positions of the step 2 structure of LIG1/3'-dG:C. **(B)** The superposition for post step 3 structure of Pmar-Lig and step 3 structures of LIG1/3'-rA:T and LIG1/3'-rG:C shows that the active site amino acids of LIG1 structures clashes with AMP of Pmar-Lig structure. RMSD between Pmar-Lig and our step 2 structure is  $\sim 0.5\text{\AA}$  with respect to AMP. The deviation in the sidechains is calculated to be  $\sim 0.2\text{\AA}$ .

| DNA ligase 1          | DNA                       | Ligation Step | Reference     |
|-----------------------|---------------------------|---------------|---------------|
| LIG1 <sup>WT</sup>    | 3'-ddC:G                  | Step 2        | 48            |
| LIG1 <sup>WT</sup>    | 3'-ddC:G+Mg <sup>2+</sup> | Step 2        | 49            |
| LIG1 <sup>WT</sup>    | 3'-dC:G                   | Step 2        | 49            |
| LIG1 <sup>EE/AA</sup> | 3'-dC:G                   | Step 2        | 49            |
| LIG1 <sup>EE/AA</sup> | 3'-8oxodG:A               | Step 2        | 49            |
| LIG1 <sup>EE/AA</sup> | 3'-dC:G                   | Step 2        | 49            |
| LIG1 <sup>EE/AA</sup> | Bulged DNA                | Step 2        | 50            |
| LIG1 <sup>R641L</sup> | 3'-dC:G                   | Step 2        | 51            |
| LIG1 <sup>R771W</sup> | 3'-dC:G                   | Step 2        | 51            |
| LIG1 <sup>EE/AA</sup> | 3'-dA:T                   | Step 2        | 52            |
| LIG1 <sup>EE/AA</sup> | 3'-dG:T                   | Step 2        | 52            |
| LIG1 <sup>EE/AA</sup> | 3'-dA:C                   | Step 1        | 52            |
| LIG1 <sup>EE/AA</sup> | 3'-dG:C                   | Step 2        | Present study |
| LIG1 <sup>EE/AA</sup> | 3'-rA:T                   | Pre-step 3    | Present study |
| LIG1 <sup>EE/AA</sup> | 3'-rG:C                   | Pre-step 3    | Present study |
| LIG1 <sup>EE/AA</sup> | 3'-rA:T                   | Post-step 3   | Present study |
| LIG1 <sup>EE/AA</sup> | 3'-rG:C                   | Post-step 3   | Present study |

**Supplementary Table 1.** The list of LIG1 structures solved previously and presented in this study.

| RMSD Å                           | LIG1 <sup>EE/AA</sup><br>3'-dA:T | LIG1 <sup>EE/AA</sup><br>3'-rA:T | LIG1 <sup>EE/AA</sup><br>3'-dG:C | LIG1 <sup>EE/AA</sup><br>3'-rG:C | LIG1 <sup>EE/AA</sup><br>3'-dA:C | LIG1 <sup>EE/AA</sup><br>3'-dG:T |
|----------------------------------|----------------------------------|----------------------------------|----------------------------------|----------------------------------|----------------------------------|----------------------------------|
| LIG1 <sup>EE/AA</sup><br>3'-dA:T |                                  | 0.537                            | 0.393                            | 0.444                            | 0.970                            | 0.539                            |
| LIG1 <sup>EE/AA</sup><br>3'-rA:T |                                  |                                  | 0.296                            | 0.296                            | 0.668                            | 0.379                            |
| LIG1 <sup>EE/AA</sup><br>3'-dG:C |                                  |                                  |                                  | 0.241                            | 0.737                            | 0.375                            |
| LIG1 <sup>EE/AA</sup><br>3'-rG:C |                                  |                                  |                                  |                                  | 0.715                            | 0.353                            |
| LIG1 <sup>EE/AA</sup><br>3'-dA:C |                                  |                                  |                                  |                                  |                                  | 0.655                            |

**Supplementary Table 2.** The root mean square deviation (RMSD) of LIG1 structures solved previously and presented in this study.

| Oligonucleotide    | Sequence (5'-3')            |
|--------------------|-----------------------------|
| Template T         | GTCCGACT <u>AC</u> GCATCAGC |
| Template C         | GTCCGACC <u>AC</u> GCATCAGC |
| Upstream A (3'-rA) | GCTGATGCGT <b>A</b>         |
| Upstream G (3'-rG) | GCTGATGCGT <b>G</b>         |
| Upstream G (3'-dG) | GCTGATGCGT <b>G</b>         |
| Downstream (5'-P)  | P-GTCGGAC                   |

**Supplementary Table 3. Oligonucleotides used in *LIG1* crystallization.** Upstream oligonucleotides including a single ribonucleotide at the 3'-end (rA and rG), upstream oligonucleotide including a canonical base at the 3'-end (dG), downstream oligo with phosphate (P) at the 5'-end, and template oligonucleotides containing T or C on a template position were used to prepare the nick DNA substrates with 3'-ribonucleotides (3'-rA:T and 3'-rG:C) and 3'-deoxyribonucleotide (3'-dG:C) for *LIG1* crystallizations. The base at template base position is underlined and the base position at the 3'-end of nick is shown in bold.

| <i>LIG1</i> <sup>EE/AA</sup> | Crystal conditions                                                 | Crystallization time (days) |
|------------------------------|--------------------------------------------------------------------|-----------------------------|
| 3'-rA:T<br>(pre-step 3)      | 100 mM MES (pH 6.7), 100 mM lithium acetate, and 16% (w/v) PEG3350 | 1                           |
| 3'-rA:T<br>(post-step 3)     | 100 mM MES (pH 6.7), 100 mM lithium acetate, and 16% (w/v) PEG3350 | 3                           |
| 3'-dG:C<br>(step 2)          | 100 mM MES (pH 6.1), 100 mM lithium acetate, and 10% (w/v) PEG3350 | 1                           |
| 3'-rG:C<br>(pre-step 3)      | 100 mM MES (pH 7.0), 100 mM lithium acetate, and 14% (w/v) PEG3350 | 1                           |
| 3'-rG:C<br>(post-step 3)     | 100 mM MES (pH 7.0), 100 mM lithium acetate, and 14% (w/v) PEG3350 | 3                           |

**Supplementary Table 4.** Crystallization conditions of *LIG1* structures solved in the study.

| Nick DNA Substrates | Sequence                                                                                                                        |
|---------------------|---------------------------------------------------------------------------------------------------------------------------------|
| 3'-dA:T             | 5'-CATGGGCGGCATGAACCA <b>G</b> AGGCCCATCCTCACC-3-FAM<br>3'-GTACCCGCCGTA <u>CTTGG</u> <u>I</u> CTCCGGGTAGGAGTGG-5'               |
| 3'-dC:G             | 5'-CATGGGCGGCATGAACCC <b>G</b> AGGCCCATCCTCACC-3-FAM<br>3'-GTACCCGCCGTA <u>CTTGGG</u> <u>C</u> TCCGGGTAGGAGTGG-5'               |
| 3'-dG:C             | 5'-CATGGGCGGCATGAACCC <b>G</b> AGGCCCATCCTCACC-3-FAM<br>3'-GTACCCGCCGTA <u>CTTGG</u> <u>C</u> TCCGGGTAGGAGTGG-5'                |
| 3'-dA:C             | 5'-CATGGGCGGCATGAACCA <b>G</b> AGGCCCATCCTCACC-3'-FAM<br>3'-GTACCCGCCGTA <u>CTTGG</u> <u>C</u> TCCGGGTAGGAGTGG-5'               |
| 3'-dG:T             | 5'-CATGGGCGGCATGAACCC <b>G</b> AGGCCCATCCTCACC-3'-FAM<br>3'-GTACCCGCCGTA <u>CTTGG</u> <u>I</u> CTCCGGGTAGGAGTGG-5'              |
| 3'-rA:T             | 5'-CATGGGCGGCATGAACCA <sup>r</sup> <b>A</b> AGGCCCATCCTCACC-3-FAM<br>3'-GTACCCGCCGTA <u>CTTGG</u> <u>I</u> CTCCGGGTAGGAGTGG-5'  |
| 3'-rC:G             | 5'-CATGGGCGGCATGAACCC <sup>r</sup> <b>C</b> GAGGCCCATCCTCACC-3-FAM<br>3'-GTACCCGCCGTA <u>CTTGGG</u> <u>C</u> TCCGGGTAGGAGTGG-5' |
| 3'-rG:C             | 5'-CATGGGCGGCATGAACCC <sup>r</sup> <b>G</b> GAGGCCCATCCTCACC-3-FAM<br>3'-GTACCCGCCGTA <u>CTTGG</u> <u>C</u> TCCGGGTAGGAGTGG-5'  |

**Supplementary Table 5. Nick DNA substrates used in ligation assays.** FAM denotes a fluorescence tag and is located at the 3'-end of the nick DNA substrates. The base at 3'-end is shown as bold and the template base is underlined.

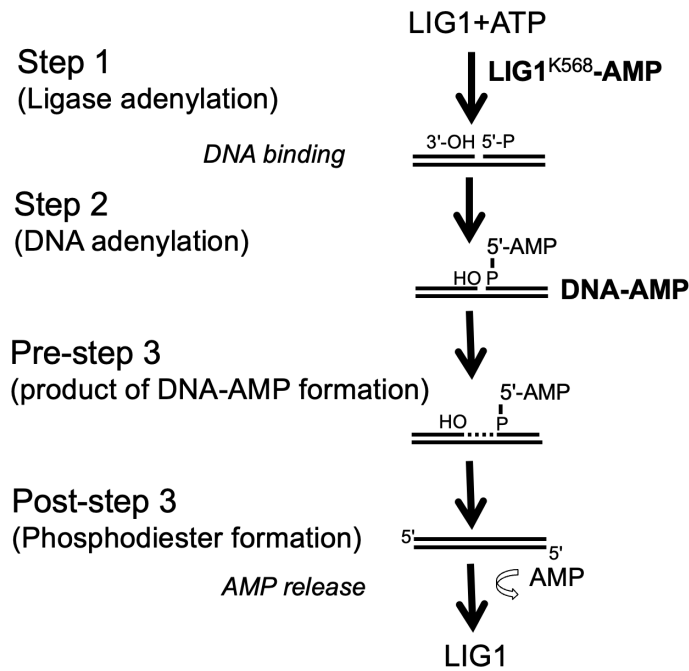

**Supplementary Scheme 1. Three consecutive steps of DNA ligation reaction.** In the first step, the ligase attacks the  $\alpha$ -phosphate of ATP, which results in an adenylate (AMP) moiety being covalently linked to the  $\epsilon$ -amino group of an active site lysine residue, (K568 of LIG1), resulting in the formation of the initial DNA ligase-AMP intermediate. The adenylated ligase then undergoes a conformational change which allows the enzyme to surveil the genome until a nick is encountered where DNA binding occurs. In the second step of the ligation reaction, the ligase catalyzes the transfer of AMP to the 5'-PO<sub>4</sub> end referring to DNA adenylation, which is followed by forming a 5'-5' phosphoanhydride high energy bond, leading to the formation the DNA-AMP product complex (referred to pre-step 3 in this study). Finally, in the third step (referred to post step 3 in this study), the ligase catalyzes in-line nucleophilic attack of the 3'-OH group onto the 5'-PO<sub>4</sub> creating a new phosphodiester bond, which is followed by displacing AMP as a leaving group.

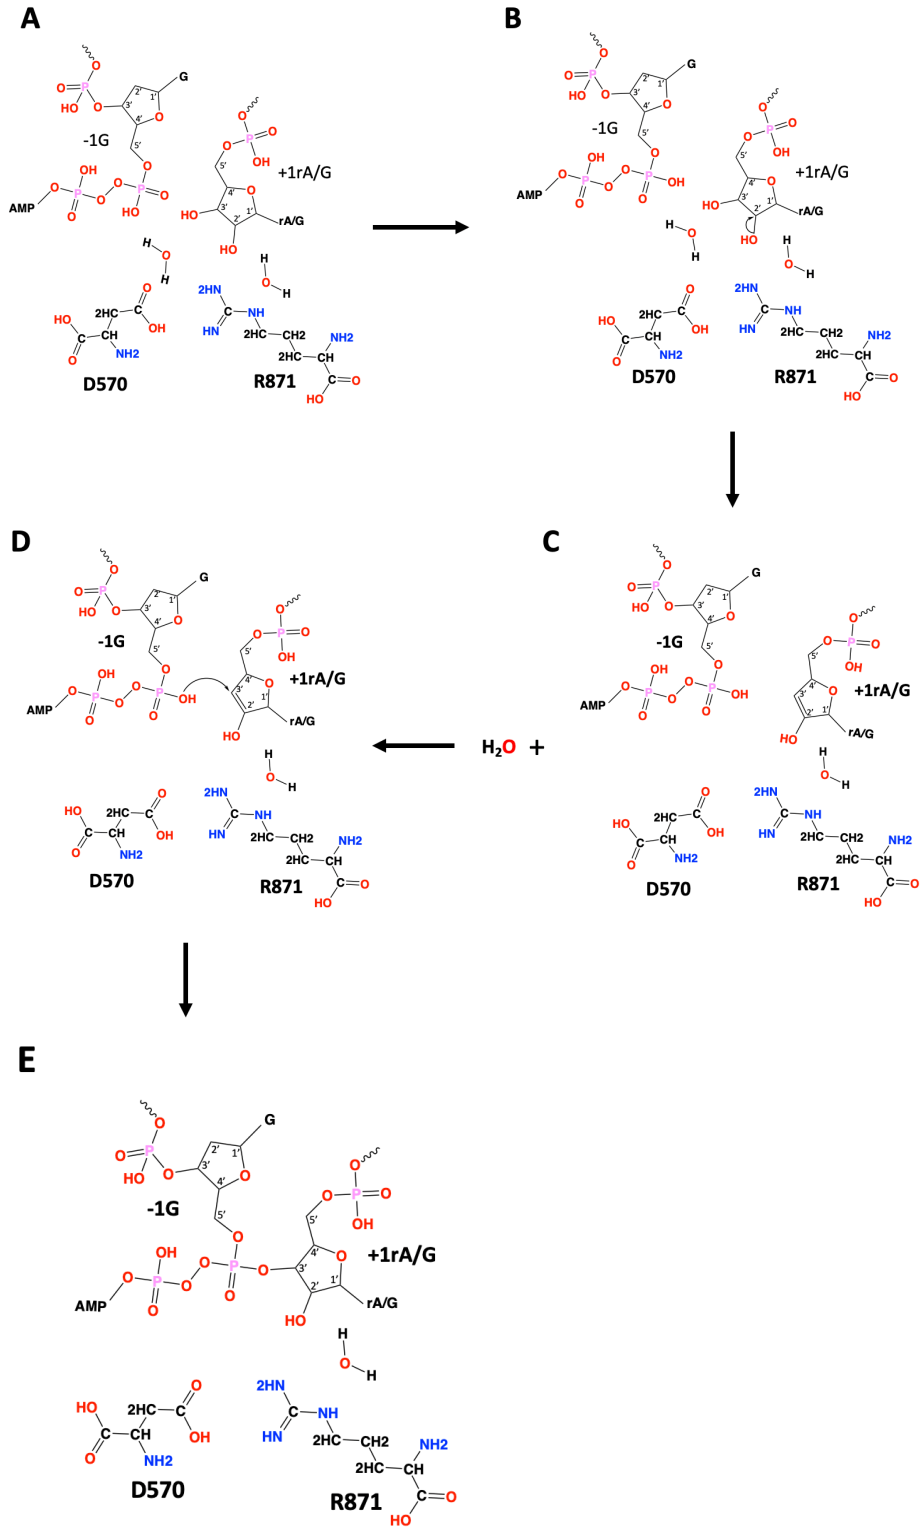

**Supplementary Scheme 2. Potential reaction leading to a lack of sugar discrimination at the 3'-end of nick by LIG1. (A-E)** Based on the LIG1 pre- and post-step 3 structures, a phosphate diester bond could form by the condensation reaction between 3'-OH and 5'-PO<sub>4</sub> ends of the nick. In pre-step 3 structures (A), the water bridge between D570 and 3'-OH and the interaction between 2'-OH and the sidechain of R871 provide a possible chemical conformation for the condensation reaction. The interaction of R871 creates electron localization at 2'-C leads to form pi bond between 2' and 3' carbons of -1rA/G of the nick while the water molecule between 3'-OH of -1rA/G of the nick and D570 directs the water leaving group at 3'-C of -1rA/G and forms carbocation at the 3'-end (B and C). Then the nucleophilic attack from hydroxyl (OH) of 5'-P of +1G of the nick can form a phosphodiester bond between 5'-P of +1G and 3'-C of -1rA/G as shown in post-step 3 structures (D and E).



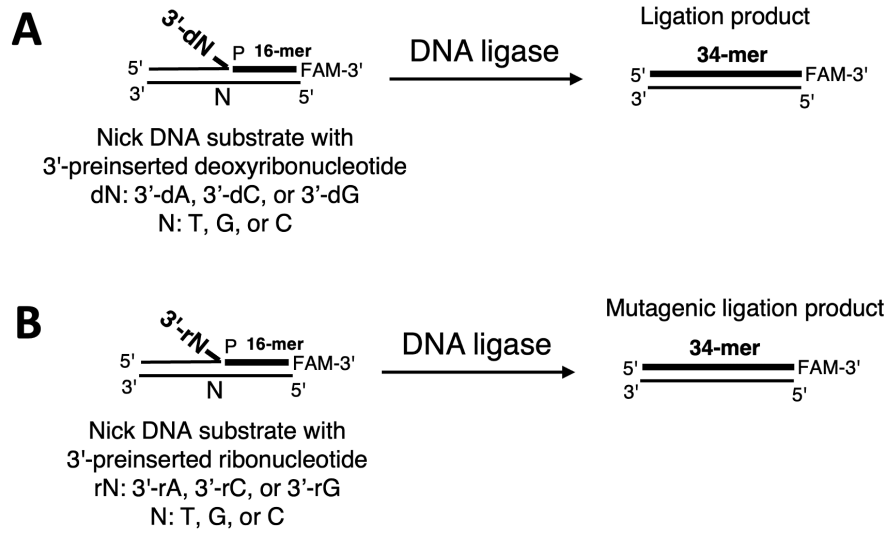

**Supplementary Scheme 3. Illustration of DNA ligation assays used in this study.** Ligation assays were used to investigate the nick sealing efficiency of DNA substrates containing preinserted Watson-Crick base-paired ends 3'-dA:T, 3'-dC:G, 3'-dG:C (**A**) and 3'-ribonucleotides 3'-rA:T, 3'-rC:G, 3'-rG:C (**B**).
